# Supplementary material for: Signaling through the Phosphatidylinositol 3-Kinase (PI3K)/Mammalian Target of Rapamycin (mTOR) Axis Is Responsible for Aerobic Glycolysis mediated by Glucose Transporter in Epidermal Growth Factor Receptor (EGFR)-mutated Lung Adenocarcinoma
Source: PubMed Central journal article supplement (PMC4498084; doi:10.1074/jbc.m115.660498), 2015-05-28
Supplement: supp_M115.660498_jbc.M115.660498-1.pdf [file supp_M115.660498_jbc.M115.660498-1.pdf]

Supplementary Table 1. Metabolic profile of quantified 116 major metabolites

| ID     | Compound name              | Pathway Label          | H1975_AZD9291 vs H1975_DM1975 |            | PKI-587 vs H1975_DMS |            | PC9_PKI-587 vs PC9_DMSO |            | HCC827_PKI-587 vs HCC827_DMSO |            |         |         |         |     |
|--------|----------------------------|------------------------|-------------------------------|------------|----------------------|------------|-------------------------|------------|-------------------------------|------------|---------|---------|---------|-----|
|        |                            |                        | Ratio ¶                       | p-value ¶¶ | Ratio ¶              | p-value ¶¶ | Ratio ¶                 | p-value ¶¶ | Ratio ¶                       | p-value ¶¶ |         |         |         |     |
| A_0001 | NAD <sup>+</sup>           | NAD+                   | 1.0                           | 0.481      | 0.8                  | 0.065      | 1.0                     | 0.973      | 0.9                           | 0.065      |         |         |         |     |
| A_0002 | cAMP                       | cAMP                   | 0.7                           | 0.225      | 0.9                  | 0.281      | 0.7                     | 0.094      | 0.9                           | 0.059      |         |         |         |     |
| A_0003 | cGMP                       | cGMP                   | N.A.                          | N.A.       | N.A.                 | N.A.       | N.A.                    | N.A.       | N.A.                          | N.A.       |         |         |         |     |
| A_0004 | NADH                       | NADH                   | 0.5                           | 0.015      | *                    | 0.4        | 0.003                   | **         | 0.7                           | 0.028      | *       | 0.8     | 0.116   |     |
| A_0005 | Xanthine                   | Xanthine               | 0.8                           | 0.335      | 0.7                  | 0.017      | *                       | 0.9        | 0.771                         | 0.9        | 0.589   |         |         |     |
| A_0006 | ADP-ribose                 | ADP-Rib                | 0.7                           | 0.127      | 0.7                  | 0.014      | *                       | 0.9        | 0.489                         | 1.0        | 0.879   |         |         |     |
| A_0007 | Mevalonic acid             | Mevalonic acid         | N.A.                          | N.A.       | N.A.                 | N.A.       | N.A.                    | N.A.       | N.A.                          | N.A.       | N.A.    |         |         |     |
| A_0008 | UDP-glucose                | UDP-Glc                | 1.0                           | 0.738      | 1.0                  | 0.962      | 0.9                     | 0.536      | 0.8                           | 0.038      | *       |         |         |     |
| A_0009 | Uric acid                  | Uric acid              | 0.9                           | 0.626      | 0.7                  | 0.028      | *                       | 0.8        | 0.720                         | 0.8        | 0.055   |         |         |     |
| A_0010 | NADP <sup>+</sup>          | NADP <sup>+</sup>      | 0.5                           | 9.0E-04    | ***                  | 0.6        | 0.020                   | *          | 0.8                           | 0.217      | 0.8     | 0.015   | *       |     |
| A_0011 | IMP                        | IMP                    | 1.6                           | 0.009      | **                   | 0.8        | 0.138                   | 0.9        | 0.269                         | 1.2        | 0.058   |         |         |     |
| A_0012 | Sedoheptulose 7-phosphate  | S7P                    | N.A.                          | N.A.       | N.A.                 | N.A.       | N.A.                    | N.A.       | N.A.                          | N.A.       | N.A.    |         |         |     |
| A_0013 | Glucose 6-phosphate        | G6P                    | 0.3                           | 0.005      | **                   | 0.4        | 0.021                   | *          | 0.8                           | 0.104      | 0.9     | 0.401   |         |     |
| A_0014 | Fructose 6-phosphate       | F6P                    | 0.11                          | N.A.       | 4.0                  | 0.068      | 0.7                     | 0.075      | 0.7                           | 0.077      |         |         |         |     |
| A_0015 | Fructose 1-phosphate       | D-F1P                  | N.A.                          | N.A.       | <1                   | N.A.       | 0.5                     | 9.3E-04    | ***                           | <1         | N.A.    |         |         |     |
| A_0016 | Galactose 1-phosphate      | Gal1P                  | 0.7                           | 0.335      | 0.9                  | 0.152      | 1.1                     | 0.487      | 0.9                           | 0.583      |         |         |         |     |
| A_0017 | Glucose 1-phosphate        | G1P                    | 0.02                          | N.A.       | 0.3                  | 0.030      | *                       | 1.2        | 0.585                         | 0.6        | 0.385   |         |         |     |
| A_0018 | Acetoacetyl CoA            | AAcCoA                 | N.A.                          | N.A.       | N.A.                 | N.A.       | N.A.                    | N.A.       | N.A.                          | N.A.       |         |         |         |     |
| A_0019 | Acetyl CoA                 | AcCoA                  | 0.5                           | 0.465      | N.A.                 | N.A.       | N.A.                    | N.A.       | 0.3                           | 0.310      |         |         |         |     |
| A_0020 | Folic acid                 | Folic acid             | 0.9                           | 0.804      | 0.8                  | 0.411      | 0.9                     | 0.532      | 0.9                           | 0.464      |         |         |         |     |
| A_0021 | Ribose 5-phosphate         | R5P                    | 0.2                           | 0.004      | **                   | 0.2        | 0.006                   | **         | 0.5                           | 0.078      | 0.6     | 0.023   | *       |     |
| A_0022 | CoA                        | CoA                    | 0.9                           | 0.464      | 0.7                  | 0.046      | *                       | 0.7        | 0.213                         | 0.8        | 0.123   |         |         |     |
| A_0023 | Ribose 1-phosphate         | R1P                    | 0.5                           | 0.267      | N.A.                 | N.A.       | N.A.                    | N.A.       | 0.3                           | 7.5E-05    | ***     |         |         |     |
| A_0024 | Ribulose 5-phosphate       | Ru5P                   | 0.2                           | 2.6E-04    | ***                  | 0.4        | 0.064                   | 0.7        | 0.149                         | 0.6        | 0.020   | *       |         |     |
| A_0025 | Xylulose 5-phosphate       | X5P                    | <1                            | N.A.       | <1                   | N.A.       | 0.10                    | N.A.       | 0.6                           | 0.137      |         |         |         |     |
| A_0026 | Erythrose 4-phosphate      | E4P                    | 0.3                           | N.A.       | N.A.                 | N.A.       | N.A.                    | N.A.       | 0.6                           | 0.045      | *       |         |         |     |
| A_0027 | HMG CoA                    | HMG-CoA                | 0.8                           | 0.178      | 0.6                  | 0.011      | *                       | 0.9        | 0.459                         | 0.7        | 0.031   | *       |         |     |
| A_0028 | Glyceraldehyde 3-phosphate | Glyceraldehyde 3-p     | 0.09                          | 0.013      | *                    | 0.2        | 0.009                   | **         | 1.2                           | 0.769      | 0.6     | 0.133   |         |     |
| A_0029 | NADPH                      | NADPH                  | 1.7                           | 0.023      | *                    | 0.7        | 0.054                   | 0.9        | 0.615                         | 1.0        | 0.916   |         |         |     |
| A_0030 | Malonyl CoA                | Malonyl-CoA            | 0.4                           | 0.075      | N.A.                 | N.A.       | N.A.                    | N.A.       | 0.3                           | 0.052      |         |         |         |     |
| A_0031 | Phosphocreatine            | Phosphocreatine        | 0.9                           | 0.264      | 0.8                  | 0.058      | 0.8                     | 0.181      | 0.8                           | 0.062      |         |         |         |     |
| A_0032 | XMP                        | XMP                    | 0.9                           | 0.775      | 0.7                  | 0.123      | 1.0                     | 0.967      | 0.6                           | 0.010      | **      |         |         |     |
| A_0033 | Dihydroxyacetone phosphate | DHAP                   | 0.2                           | 0.021      | *                    | 0.2        | 0.028                   | *          | 0.6                           | 0.063      | 0.9     | 0.464   |         |     |
| A_0034 | Adenylosuccinic acid       | Succinyl AMP           | 1.2                           | 0.030      | *                    | 0.7        | 0.044                   | *          | 1.0                           | 0.548      | 1.2     | 0.555   |         |     |
| A_0035 | Fructose 1,6-diphosphate   | F1,6P                  | 0.3                           | 0.015      | *                    | 0.3        | 0.009                   | **         | 0.4                           | 0.015      | *       | 1.0     | 0.855   |     |
| A_0036 | 6-Phosphogluconic acid     | 6-PG                   | 0.10                          | 0.004      | **                   | 0.14       | 0.005                   | **         | 0.5                           | 0.035      | *       | 0.6     | 0.002   | **  |
| A_0037 | N-Carbamoylaspartic acid   | Carbamoyl-Asp          | 0.4                           | 0.009      | **                   | 0.07       | 0.004                   | **         | 0.2                           | 0.019      | *       | 0.3     | 0.001   | **  |
| A_0038 | PRPP                       | PRPP                   | 0.6                           | 0.037      | *                    | 0.2        | 0.007                   | **         | 0.7                           | 0.254      | 0.5     | 0.066   |         |     |
| A_0039 | 2-Phosphoglyceric acid     | 2-PG                   | 0.3                           | 0.282      | 0.5                  | 0.007      | **                      | 0.8        | 0.028                         | *          | 0.6     | 0.025   | *       |     |
| A_0040 | 2,3-Diphosphoglyceric acid | Diphosphoglycerate     | 0.2                           | 0.014      | *                    | 0.3        | 0.012                   | *          | 0.7                           | 0.056      | 0.7     | 0.033   | *       |     |
| A_0041 | 3-Phosphoglyceric acid     | 3-PG                   | 1.2                           | 0.523      | 0.5                  | 0.016      | *                       | 0.8        | 0.117                         | 0.6        | 0.036   | *       |         |     |
| A_0042 | Phosphoenolpyruvic acid    | PEP                    | 1.5                           | 0.195      | 0.4                  | 0.010      | *                       | 0.6        | 0.053                         | 0.5        | 0.040   | *       |         |     |
| A_0043 | GMP                        | GMP                    | 1.3                           | 0.027      | *                    | 0.9        | 0.259                   | 1.0        | 0.998                         | 1.2        | 0.196   |         |         |     |
| A_0044 | AMP                        | AMP                    | 1.2                           | 0.068      | 0.8                  | 0.020      | *                       | 0.9        | 0.312                         | 1.1        | 0.414   |         |         |     |
| A_0045 | 2-Oxoisovaleric acid       | 2-KIV                  | N.A.                          | N.A.       | N.A.                 | N.A.       | N.A.                    | N.A.       | 1.0                           | 0.741      |         |         |         |     |
| A_0046 | GDP                        | GDP                    | 1.8                           | 0.004      | **                   | 0.9        | 0.064                   | 1.0        | 0.868                         | 1.2        | 0.233   |         |         |     |
| A_0047 | Lactic acid                | Lactic acid            | 0.3                           | 0.002      | **                   | 0.4        | 1.1E-04                 | ***        | 0.7                           | 0.009      | **      | 0.7     | 0.021   | *   |
| A_0048 | ADP                        | ADP                    | 1.9                           | 1.2E-05    | ***                  | 0.8        | 0.062                   | 0.9        | 0.274                         | 1.1        | 0.217   |         |         |     |
| A_0049 | GTP                        | GTP                    | 0.9                           | 0.016      | *                    | 0.7        | 0.021                   | *          | 1.0                           | 0.881      | 1.0     | 0.883   |         |     |
| A_0050 | Glyoxylate                 | Glyoxylate             | N.A.                          | N.A.       | N.A.                 | N.A.       | N.A.                    | N.A.       | N.A.                          | N.A.       | N.A.    |         |         |     |
| A_0051 | ATP                        | ATP                    | 0.8                           | 0.013      | *                    | 0.7        | 0.028                   | *          | 1.0                           | 0.994      | 1.0     | 0.356   |         |     |
| A_0052 | Glycerol 3-phosphate       | Glycerol 3-phosphate   | 0.7                           | 0.009      | **                   | 0.7        | 0.043                   | *          | 0.6                           | 0.004      | **      | 0.9     | 0.077   |     |
| A_0053 | Glycolic acid              | Glycolic acid          | N.A.                          | N.A.       | N.A.                 | N.A.       | N.A.                    | N.A.       | N.A.                          | N.A.       | N.A.    |         |         |     |
| A_0054 | Pyruvic acid               | Pyruvic acid           | 0.4                           | 0.007      | **                   | 0.3        | 0.002                   | **         | 1.4                           | 0.111      | 0.6     | 0.003   | **      |     |
| A_0055 | N-Acetylglutamic acid      | N-AcGlu                | 0.9                           | 0.260      | 1.1                  | 0.697      | 0.2                     | 0.122      | 1.0                           | 0.599      |         |         |         |     |
| A_0056 | 2-Hydroxyglutaric acid     | 2-Hydroxyglutaric acid | 0.5                           | 9.3E-05    | ***                  | 0.4        | 1.9E-04                 | ***        | 0.5                           | 0.020      | *       | 0.5     | 9.6E-04 | *** |
| A_0057 | Carbamoylphosphate         | Carbamoyl-P            | N.A.                          | N.A.       | N.A.                 | N.A.       | N.A.                    | N.A.       | N.A.                          | N.A.       | N.A.    |         |         |     |
| A_0058 | Succinic acid              | Succinic acid          | 0.8                           | 0.004      | **                   | 0.6        | 0.028                   | *          | 0.8                           | 0.241      | 0.7     | 0.003   | **      |     |
| A_0059 | Malic acid                 | Malic acid             | 0.5                           | 8.0E-04    | ***                  | 0.6        | 0.004                   | **         | 0.7                           | 0.010      | *       | 0.6     | 6.7E-04 | *** |
| A_0060 | 2-Oxoglutaric acid         | 2-OG                   | 0.7                           | 0.013      | *                    | 0.6        | 7.1E-04                 | ***        | 0.6                           | 0.025      | *       | 0.6     | 0.007   | **  |
| A_0061 | Fumaric acid               | Fumaric acid           | 0.5                           | 2.4E-05    | ***                  | 0.6        | 0.008                   | **         | 0.7                           | 0.007      | **      | 0.6     | 3.3E-05 | *** |
| A_0062 | Citric acid                | Citric acid            | 0.8                           | 0.003      | **                   | 0.7        | 0.009                   | **         | 1.0                           | 0.938      | 0.7     | 0.035   | *       |     |
| A_0063 | cis-Aconitic acid          | cis-Aconitic acid      | 0.8                           | 0.043      | *                    | 0.7        | 0.018                   | *          | 1.0                           | 0.890      | 0.7     | 0.033   | *       |     |
| A_0064 | Isocitric acid             | Isocitric acid         | 0.9                           | 0.365      | 0.8                  | 0.068      | 1.1                     | 0.665      | 0.8                           | 0.463      |         |         |         |     |
| C_0001 | Urea                       | Urea                   | 0.8                           | 0.018      | *                    | 0.8        | 0.034                   | *          | 0.8                           | 0.053      | 0.9     | 0.285   |         |     |
| C_0002 | Gly                        | Gly                    | 1.2                           | 0.047      | *                    | 1.4        | 0.007                   | **         | 1.6                           | 0.002      | **      | 1.8     | 8.5E-04 | *** |
| C_0003 | Putrescine                 | Putrescine             | 0.6                           | 0.001      | **                   | 0.5        | 0.001                   | **         | 0.9                           | 0.211      | 0.8     | 0.033   | *       |     |
| C_0004 | Sarcosine                  | Sarcosine              | 0.8                           | 0.272      | 1.1                  | 0.119      | 2.2                     | 1.2E-04    | ***                           | 1.4        | 0.312   |         |         |     |
| C_0005 | β-Ala                      | b-Ala                  | 1.0                           | 0.647      | 0.6                  | 0.094      | 1.8                     | 0.611      | 0.9                           | 0.323      |         |         |         |     |
| C_0006 | Ala                        | Ala                    | 0.8                           | 0.068      | 0.9                  | 0.070      | 0.5                     | 0.004      | **                            | 1.7        | 9.0E-04 | ***     |         |     |
| C_0007 | N,N-Dimethylglycine        | DMG                    | N.A.                          | N.A.       | 1.0                  | 0.508      | 0.7                     | 3.8E-04    | ***                           | N.A.       | N.A.    |         |         |     |
| C_0008 | γ-Aminobutyric acid        | g-Aminobutyric acid    | 1.1                           | 0.496      | N.A.                 | N.A.       | N.A.                    | N.A.       | 1.0                           | 0.861      |         |         |         |     |
| C_0009 | Choline                    | Choline                | 2.1                           | 5.0E-04    | ***                  | 11         | 2.1E-05                 | ***        | N.A.                          | N.A.       | 1.7     | 0.003   | **      |     |
| C_0010 | Ser                        | Ser                    | 0.7                           | 0.004      | **                   | 1.3        | 0.001                   | **         | 2.2                           | 2.2E-04    | ***     | 2.1     | 0.002   | **  |
| C_0011 | Carnosine                  | Carnosine              | 1.4                           | 0.111      | 0.8                  | 0.117      | 0.9                     | 0.401      | 0.9                           | 0.763      |         |         |         |     |
| C_0012 | Creatinine                 | Creatinine             | 0.8                           | 0.047      | *                    | 0.8        | 0.071                   | 0.8        | 0.127                         | 0.9        | 0.344   |         |         |     |
| C_0013 | Pro                        | Pro                    | 0.9                           | 0.053      | 1.8                  | 0.001      | **                      | 2.1        | 1.4E-04                       | ***        | 1.3     | 0.027   | *       |     |
| C_0014 | Val                        | Val                    | 1.1                           | 0.413      | 1.7                  | 4.4E-05    | ***                     | 2.4        | 2.1E-04                       | ***        | 2.2     | 3.0E-04 | ***     |     |
| C_0015 | Betaine                    | Betaine                | N.A.                          | N.A.       | 7.2                  | 0.043      | *                       | N.A.       | N.A.                          | 1.1        | 0.726   |         |         |     |
| C_0016 | Thr                        | Thr                    | 0.9                           | 0.066      | 1.6                  | 0.007      | **                      | 2.3        | 0.004                         | **         | 2.0     | 0.001   | **      |     |
| C_0017 | Homoserine                 | Homoserine             | N.A.                          | N.A.       | N.A.                 | N.A.       | N.A.                    | N.A.       | N.A.                          | N.A.       | N.A.    |         |         |     |
| C_0018 | Betaine aldehyde           | BTL                    | N.A.                          | N.A.       | N.A.                 | N.A.       | N.A.                    | N.A.       | N.A.                          | N.A.       | N.A.    |         |         |     |
| C_0019 | Cys                        | Cys                    | 1.3                           | 0.210      | 1.4                  | 0.392      | <1                      | N.A.       | 1.1                           | 0.812      |         |         |         |     |
| C_0020 | Hydroxyproline             | Hydroxyproline         | 0.8                           | 0.005      | **                   | 1.1        | 0.025                   | *          | 1.5                           | 0.013      | *       | 1.3     | 0.028   | *   |
| C_0021 | Creatine                   | Creatine               | 1.1                           | 0.196      | 0.9                  | 0.378      | 0.5                     | 0.002      | **                            | 1.0        | 0.613   |         |         |     |
| C_0022 | Ile                        | Ile                    | 1.0                           | 0.556      | 1.4                  | 8.3E-04    | ***                     | 2.1        | 0.002                         | **         | 1.8     | 7.4E-04 | ***     |     |
| C_0023 | Leu                        | Leu                    | 1.0                           | 0.997      | 1.5                  | 0.001      | **                      | 2.1        | 3.7E-04                       | ***        | 1.9     | 3.2E-04 | ***     |     |
| C_0024 | Asn                        | Asn                    | 0.8                           | 0.001      | **                   | 1.2        | 0.022                   | *          | 2.1                           | 6.5E-04    | ***     | 1.7     | 0.001   | **  |
| C_0025 | Ornithine                  | Ornithine              | 1.1                           | 0.483      | 1.2                  | 0.068      | 1.4                     | 0.146      | 2.1                           | 0.029      | *       |         |         |     |
| C_0026 | Asp                        | Asp                    | 1.3                           | 9.0E-04    | ***                  | 1.2        | 0.051                   | 1.8        | 0.002                         | **         | 1.3     | 0.004   | **      |     |

|        |                                        |               |      |         |      |         |         |         |         |         |         |         |
|--------|----------------------------------------|---------------|------|---------|------|---------|---------|---------|---------|---------|---------|---------|
| C_0029 | Hypoxanthine                           | Hypoxanthine  | N.A. | N.A.    | 1<   | N.A.    | N.A.    | N.A.    | N.A.    | N.A.    | N.A.    | N.A.    |
| C_0030 | Spermidine                             | Spermidine    | 0.9  | 0.239   | 0.9  | 0.130   | 0.9     | 0.077   | 1.0     | 0.771   | 0.771   | 0.771   |
| C_0031 | Gln                                    | Gln           | 0.8  | 0.095   | 1.6  | 0.004   | **      | 2.1     | 0.002   | **      | 2.5     | 0.025   |
| C_0032 | Lys                                    | Lys           | 1.1  | 0.521   | 2.0  | 0.001   | **      | 1.8     | 0.017   | *       | 2.3     | 0.021   |
| C_0033 | Glu                                    | Glu           | 0.9  | 0.018   | *    | 0.9     | 0.101   | 1.1     | 0.025   | *       | 1.0     | 0.341   |
| C_0034 | Met                                    | Met           | 1.0  | 0.862   | 1.4  | 0.008   | **      | 2.3     | 0.007   | **      | 2.0     | 3.6E-04 |
| C_0035 | Guanine                                | Guanine       | N.A. | N.A.    | N.A. | N.A.    | N.A.    | N.A.    | N.A.    | N.A.    | N.A.    | N.A.    |
| C_0036 | His                                    | His           | 1.0  | 0.807   | 1.5  | 0.025   | *       | 2.2     | 0.002   | **      | 1.9     | 0.005   |
| C_0037 | Carnitine                              | Carnitine     | 0.6  | 0.015   | *    | 1.1     | 0.651   | N.A.    | N.A.    | N.A.    | 1.0     | 0.706   |
| C_0038 | Phe                                    | Phe           | 1.0  | 0.606   | 1.6  | 1.9E-04 | ***     | 2.2     | 1.1E-04 | ***     | 1.9     | 5.7E-04 |
| C_0039 | Arg                                    | Arg           | 0.9  | 0.124   | 1.4  | 0.003   | **      | 1.5     | 0.018   | *       | 1.4     | 0.059   |
| C_0040 | Citrulline                             | Citrulline    | 0.8  | 0.070   | 1.2  | 0.047   | *       | 1.6     | 0.033   | *       | 1.6     | 0.049   |
| C_0041 | Tyr                                    | Tyr           | 1.0  | 0.772   | 1.5  | 0.002   | **      | 2.1     | 3.9E-06 | ***     | 1.9     | 2.0E-04 |
| C_0042 | S-Adenosylhomocysteine                 | SAH           | 0.8  | N.A.    | 1.1  | 0.453   | 0.7     | 0.216   | 1.0     | 0.979   | 1.0     | 0.979   |
| C_0043 | Spermine                               | Spermine      | 1.2  | 0.255   | 1.2  | 0.564   | 0.7     | 0.229   | 1.0     | 0.742   | 1.0     | 0.742   |
| C_0044 | Trp                                    | Trp           | 1.0  | 0.602   | 1.5  | 4.1E-04 | ***     | 2.1     | 2.0E-05 | ***     | 1.8     | 2.3E-04 |
| C_0045 | Cystathionine                          | Cystathionine | 0.8  | 0.140   | 1.2  | 0.061   | 1.5     | 0.006   | **      | 1.9     | 7.9E-04 | ***     |
| C_0046 | Adenosine                              | Adenosine     | 0.9  | 0.214   | 0.6  | 0.033   | *       | N.A.    | N.A.    | N.A.    | 0.9     | 0.044   |
| C_0047 | Inosine                                | Inosine       | 0.6  | N.A.    | N.A. | N.A.    | N.A.    | N.A.    | N.A.    | N.A.    | N.A.    | N.A.    |
| C_0048 | Guanosine                              | Guanosine     | 0.9  | N.A.    | 1<   | N.A.    | N.A.    | N.A.    | N.A.    | N.A.    | 1.4     | N.A.    |
| C_0049 | Argininosuccinic acid                  | ArgSuccinate  | 0.6  | 0.006   | **   | 1.3     | 7.6E-04 | ***     | 1.4     | 0.039   | *       | 1.0     |
| C_0050 | Glutathione (GSSG)                     | GSSG          | 1.1  | 0.495   | 1.0  | 0.875   | 1.1     | 0.820   | 1.0     | 0.950   | 1.0     | 0.950   |
| C_0051 | Glutathione (GSH)                      | GSH           | 0.9  | 0.086   | 0.8  | 0.045   | *       | 1.0     | 0.976   | 0.9     | 0.129   | 0.129   |
| C_0052 | S-Adenosylmethionine                   | SAM           | 0.9  | 0.046   | *    | 1.1     | 0.010   | *       | 1.1     | 0.465   | 1.0     | 0.648   |
| -      | Adenylate Energy Charge                | No Label      | 1.0  | 3.5E-04 | ***  | 1.0     | 0.084   | 1.0     | 0.190   | 1.0     | 0.220   | 0.220   |
| -      | Total Adenylate                        | No Label      | 0.9  | 0.047   | *    | 0.7     | 0.027   | *       | 1.0     | 0.903   | 1.0     | 0.440   |
| -      | Guanylate Energy Charge                | No Label      | 1.0  | 2.2E-04 | ***  | 1.0     | 0.023   | *       | 1.0     | 0.708   | 1.0     | 0.280   |
| -      | Total Guanylate                        | No Label      | 0.9  | 0.051   | 0.7  | 0.022   | *       | 1.0     | 0.895   | 1.0     | 0.720   | 0.720   |
| -      | GSH/GSSG                               | No Label      | 0.8  | 0.159   | 0.8  | 0.305   | 1.0     | 0.877   | 0.9     | 0.569   | 0.9     | 0.569   |
| -      | Total Glutathione                      | No Label      | 0.9  | 0.069   | 0.8  | 0.045   | *       | 1.0     | 0.870   | 0.9     | 0.260   | 0.260   |
| -      | NADPH/NADP+                            | No Label      | 3.2  | 0.018   | *    | 1.1     | 0.531   | 1.2     | 0.132   | 1.2     | 0.239   | 0.239   |
| -      | NADH/NAD+                              | No Label      | 0.5  | 0.007   | **   | 0.5     | 6.4E-04 | ***     | 0.7     | 6.4E-04 | ***     | 0.9     |
| -      | Lactate/Pyruvate                       | No Label      | 0.7  | 0.096   | 1.4  | 0.005   | **      | 0.5     | 0.019   | *       | 1.1     | 0.105   |
| -      | Glycerol 3-phosphate/DHAP              | No Label      | 3.7  | 0.003   | **   | 4.6     | 0.002   | **      | 1.0     | 0.966   | 1.0     | 0.957   |
| -      | Total Amino Acids                      | No Label      | 1.0  | 0.147   | 1.1  | 0.048   | *       | 1.9     | 3.9E-04 | ***     | 1.4     | 0.003   |
| -      | Total Essential Amino Acids            | No Label      | 1.0  | 0.830   | 1.5  | 6.7E-05 | ***     | 2.2     | 2.0E-04 | ***     | 1.9     | 5.8E-04 |
| -      | Total Non-essential Amino Acids        | No Label      | 1.0  | 0.110   | 1.1  | 0.076   | 1.8     | 3.6E-04 | ***     | 1.3     | 0.004   | **      |
| -      | Total Glucogenic Amino Acids           | No Label      | 1.0  | 0.130   | 1.1  | 0.054   | 1.8     | 4.2E-04 | ***     | 1.3     | 0.003   | **      |
| -      | Total Ketogenic Amino Acids            | No Label      | 1.0  | 0.672   | 1.5  | 2.8E-04 | ***     | 2.1     | 0.001   | **      | 1.9     | 5.9E-04 |
| -      | Total BCAA                             | No Label      | 1.0  | 0.998   | 1.5  | 2.9E-04 | ***     | 2.1     | 2.9E-05 | ***     | 1.9     | 4.3E-04 |
| -      | Total Aromatic Amino Acids             | No Label      | 1.0  | 0.674   | 1.6  | 3.5E-04 | ***     | 2.1     | 1.2E-05 | ***     | 1.9     | 2.1E-04 |
| -      | Fischer's Ratio                        | No Label      | 1.0  | 0.430   | 1.0  | 0.288   | 1.0     | 0.486   | 1.0     | 0.403   | 1.0     | 0.403   |
| -      | Total Glu-related Amino Acids          | No Label      | 0.9  | 0.011   | *    | 1.0     | 0.521   | 1.7     | 2.6E-04 | ***     | 1.1     | 0.037   |
| -      | Total Pyr-related Amino Acids          | No Label      | 1.0  | 0.863   | 1.3  | 0.014   | *       | 2.0     | 7.1E-04 | ***     | 1.8     | 7.4E-04 |
| -      | Total Acetyl CoA-related Amino Acids   | No Label      | 1.0  | 0.929   | 1.5  | 2.0E-04 | ***     | 2.1     | 5.9E-04 | ***     | 1.9     | 6.5E-04 |
| -      | Total Fumarate-related Amino Acids     | No Label      | 1.0  | 0.687   | 1.6  | 3.1E-04 | ***     | 2.1     | 4.7E-05 | ***     | 1.9     | 2.3E-04 |
| -      | Total Succinyl CoA-related Amino Acids | No Label      | 1.0  | 0.977   | 1.5  | 2.0E-04 | ***     | 2.2     | 8.9E-06 | ***     | 1.9     | 3.2E-04 |
| -      | Total Oxaloacetate-related Amino Acids | No Label      | 1.1  | 0.008   | **   | 1.2     | 0.038   | *       | 2.0     | 0.002   | **      | 1.4     |
| -      | Malate/Asp                             | No Label      | 0.4  | 0.001   | **   | 0.5     | 0.004   | **      | 0.4     | 0.005   | **      | 0.5     |
| -      | Citrulline/Ornithine                   | No Label      | 0.8  | 0.013   | *    | 1.0     | 0.657   | 1.1     | 0.372   | 0.8     | 0.014   | *       |
| -      | Glu/2-Oxoglutarate                     | No Label      | 1.3  | 0.022   | *    | 1.5     | 0.015   | *       | 2.0     | 6.1E-05 | ***     | 1.9     |
| -      | G6P/R5P                                | No Label      | 1.6  | 0.068   | 2.0  | 0.033   | *       | 1.6     | 0.035   | *       | 1.5     | 0.047   |
| -      | SAM/SAH                                | No Label      | 1.0  | N.A.    | 1.0  | 0.902   | 1.4     | 0.195   | 1.0     | 0.734   | 1.0     | 0.734   |
| -      | Putrescine/Spermidine                  | No Label      | 0.7  | 0.042   | *    | 0.6     | 0.007   | **      | 1.0     | 0.774   | 0.8     | 0.075   |

C: Cation mode, A: Anion mode

N.D.: Not Detected.

N.A.: Not Available.

Ration = Inhibitors/DMSO, n = 3.

<sup>||</sup> Welch *t*-test, *p*-value (\*<0.05, \*\*<0.01, \*\*\*<0.001)
